# Supplementary material for: BMI1 is associated with CSF amyloid-β and rates of cognitive decline in Alzheimer’s disease
Source: PubMed Central journal article supplement (PMC8493672; doi:10.1186/s13195-021-00906-4), 2021-10-05

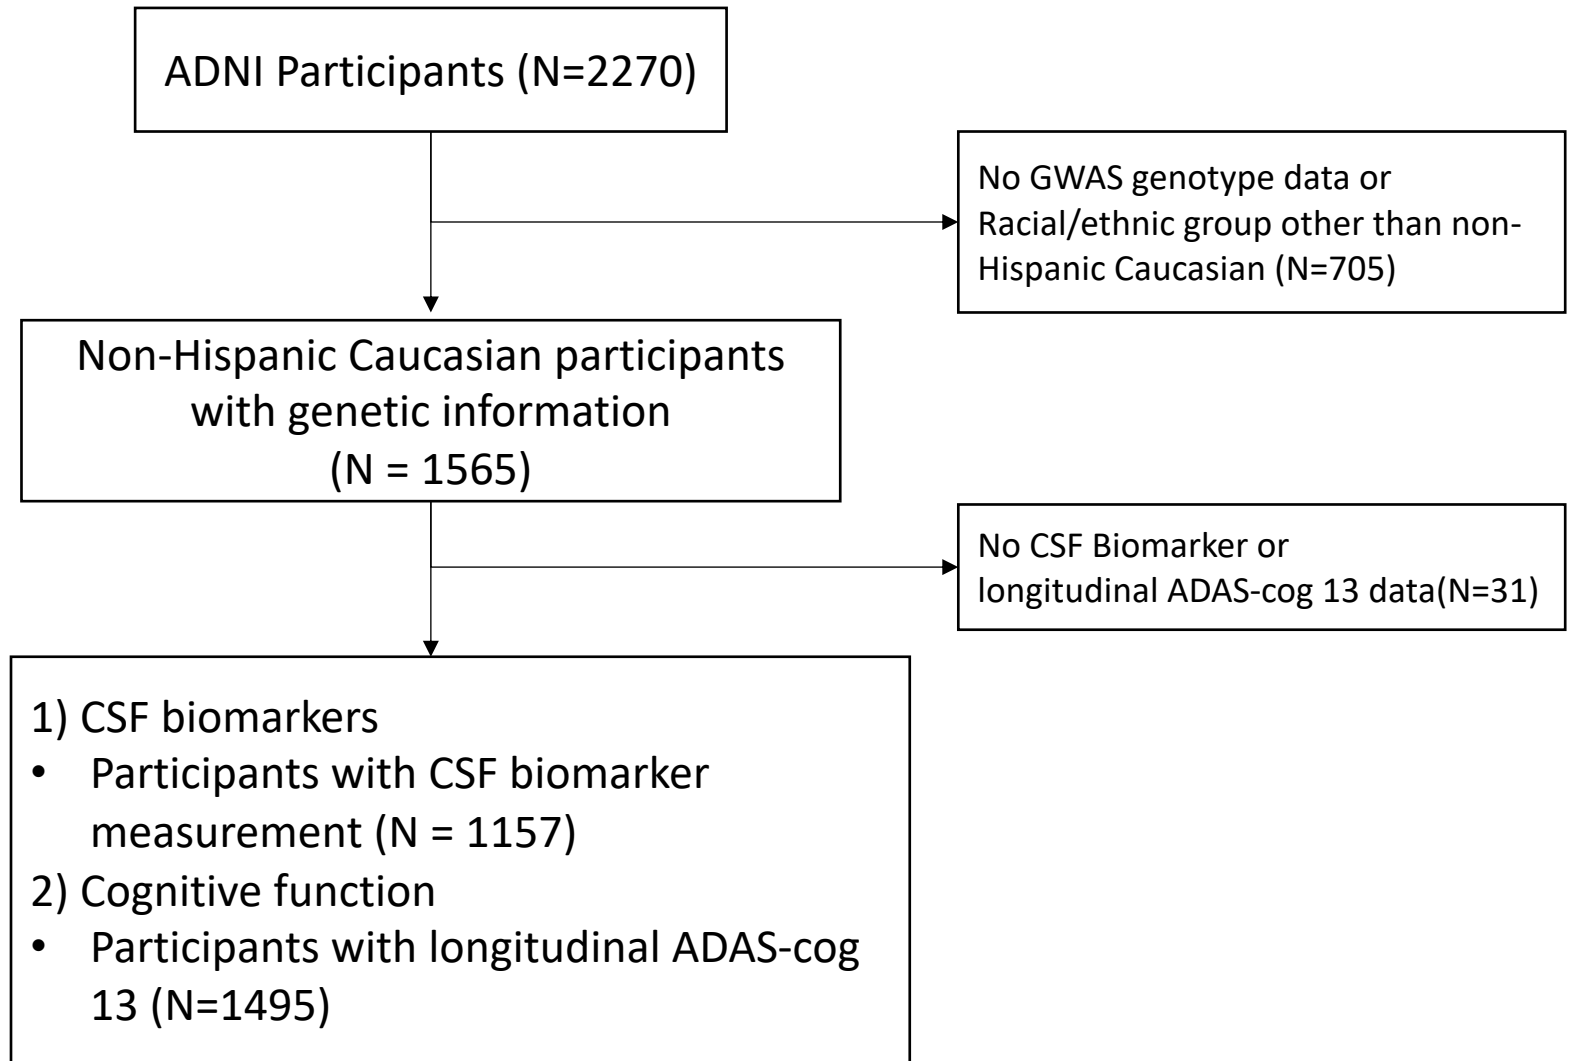

Supplement: 13195_2021_906_MOESM1_ESM.pdf [file 13195_2021_906_MOESM1_ESM.pdf]
